# Supplementary material for: Simulation of Carbon Exchange from a Permafrost Peatland in the Great Hing’an Mountains Based on CoupModel
Source: MDPI journal article supplement (doi:10.3390/atmos13010044), 2021-12-28
Supplement: s1 [file s1]

Supplementary Materials

# Simulation of Carbon Exchange from a Permafrost Peatland in the Great Hing'an Mountains Based on CoupModel

Yue Li <sup>1,2</sup>, Zhong Mei Wan <sup>1,\*</sup> and Li Sun <sup>2,\*</sup>

<sup>1</sup> College of Earth Sciences, Jilin University, Changchun 130061, China; yli18@mails.jlu.edu.cn

<sup>2</sup> Key Laboratory of Wetland Ecology and Environment, Northeast Institute of Geography and Agroecology, Chinese Academy of Sciences, Changchun 130102, China

\* Correspondence: wanzm@jlu.edu.cn (Z.W.M.); sunli@iga.ac.cn (L.S.)

**Table S1.** The correlation analysis between NEE simulation value and environmental factors in Scheme I (\*\* indicates significant at  $p < 0.1$  level).

| RCP Scenarios | Correlation parameters | Air Temperature | Precipitation | Net Radiation | Relative humidity |
|---------------|------------------------|-----------------|---------------|---------------|-------------------|
| RCP2.6        | $R^2$                  | 0.84            | 0.17          | 0.34          | 0.26              |
|               | $p$                    | 0.00**          | 0.51          | 0.1**         | 0.27              |
| RCP6.0        | $R^2$                  | 0.81            | 0.48          | 0.28          | 0.15              |
|               | $p$                    | 0.00**          | 0.07**        | 0.52          | 0.69              |
| RCP8.5        | $R^2$                  | 0.72            | 0.51          | 0.31          | 0.27              |
|               | $p$                    | 0.00**          | 0.1**         | 0.1**         | 0.71              |

**Table S2.** The correlation analysis between NEE simulation value and environmental factors in Scheme II (\*\* indicates significant at  $p < 0.1$  level).

| RCP Scenarios | Correlation parameters | Air Temperature | Precipitation | Net Radiation | Relative humidity |
|---------------|------------------------|-----------------|---------------|---------------|-------------------|
| RCP2.6        | $R^2$                  | 0.88            | 0.25          | 0.33          | 0.15              |
|               | $p$                    | 0.00**          | 0.27          | 0.1**         | 0.61              |
| RCP6.0        | $R^2$                  | 0.85            | 0.17          | 0.32          | 0.21              |
|               | $p$                    | 0.00**          | 0.46          | 0.1**         | 0.39              |
| RCP8.5        | $R^2$                  | 0.83            | 0.68          | 0.23          | 0.41              |
|               | $p$                    | 0.00**          | 0.06**        | 0.1**         | 0.1**             |

**Table S3.** The correlation analysis between ER simulation value and environmental factors in Scheme I (\*\* indicates significant at  $p < 0.1$  level).

| RCP Scenarios | Correlation parameters | Air Temperature | Precipitation | Net Radiation | Relative humidity |
|---------------|------------------------|-----------------|---------------|---------------|-------------------|
| RCP2.6        | $R^2$                  | 0.88            | 0.14          | 0.34          | 0.27              |
|               | $p$                    | 0.00**          | 0.33          | 0.1**         | 0.1**             |
| RCP6.0        | $R^2$                  | 0.83            | 0.40          | 0.30          | 0.14              |
|               | $p$                    | 0.00**          | 0.07**        | 0.06**        | 0.39              |
| RCP8.5        | $R^2$                  | 0.87            | 0.46          | 0.40          | 0.27              |
|               | $p$                    | 0.00**          | 0.1**         | 0.1**         | 0.71              |

**Table S4.** The correlation analysis between ER simulation value and environmental factors in Scheme II (\*\* indicates significant at  $p < 0.1$  level).

| RCP Scenarios | Correlation parameters | Air Temperature | Precipitation | Net Radiation | Relative humidity |
|---------------|------------------------|-----------------|---------------|---------------|-------------------|
| RCP2.6        | $R^2$                  | 0.88            | 0.14          | 0.26          | 0.26              |
|               | $p$                    | 0.00**          | 0.42          | 0.34          | 0.22              |
| RCP6.0        | $R^2$                  | 0.83            | 0.32          | 0.34          | 0.19              |

|        |       |        |        |        |       |
|--------|-------|--------|--------|--------|-------|
| RCP8.5 | $p$   | 0.00** | 0.09** | 0.06** | 0.52  |
|        | $R^2$ | 0.87   | 0.30   | 0.41   | 0.32  |
|        | $p$   | 0.00** | 0.1**  | 0.1**  | 0.1** |

**Table S5.** The correlation analysis between GPP simulation value and environmental factors in Scheme I (\*\* indicates significant at  $p < 0.1$  level).

| RCP Scenarios | Correlation parameters | Air Temperature | Precipitation | Net Radiation | Relative humidity |
|---------------|------------------------|-----------------|---------------|---------------|-------------------|
| RCP2.6        | $R^2$                  | 0.86            | 0.12          | 0.31          | 0.28              |
|               | $p$                    | 0.00**          | 0.45          | 0.1**         | 0.1**             |
| RCP6.0        | $R^2$                  | 0.87            | 0.42          | 0.24          | 0.12              |
|               | $p$                    | 0.00**          | 0.01**        | 0.1**         | 0.39              |
| RCP8.5        | $R^2$                  | 0.81            | 0.47          | 0.38          | 0.18              |
|               | $p$                    | 0.00**          | 0.07**        | 0.1**         | 0.61              |

**Table S6.** The correlation analysis between GPP simulation value and environmental factors in Scheme II (\*\* indicates significant at  $p < 0.1$  level).

| RCP Scenarios | Correlation parameters | Air Temperature | Precipitation | Net Radiation | Relative humidity |
|---------------|------------------------|-----------------|---------------|---------------|-------------------|
| RCP2.6        | $R^2$                  | 0.87            | 0.13          | 0.18          | 0.16              |
|               | $p$                    | 0.00**          | 0.61          | 0.27          | 0.33              |
| RCP6.0        | $R^2$                  | 0.81            | 0.34          | 0.30          | 0.25              |
|               | $p$                    | 0.00**          | 0.1**         | 0.08**        | 0.66              |
| RCP8.5        | $R^2$                  | 0.84            | 0.35          | 0.32          | 0.19              |
|               | $p$                    | 0.00**          | 0.09**        | 0.1**         | 0.29              |
